# Supplementary material for: Characteristics and Sources of Selected Halocarbon and Hydrocarbon Volatile Organic Compounds in Surface Water of the Han River Basin
Source: MDPI journal article supplement (doi:10.3390/w13182568), 2021-09-17
Supplement: s1 [file s1]

# Characteristics and Sources of Selected Halocarbon and Hydrocarbon Volatile Organic Compounds in Surface Water of the Han River Basin

Jong Kwon Im <sup>1</sup>, Sujin Kim <sup>2</sup>, Young Seuk Kim <sup>1</sup>, Hye Ran Noh <sup>1</sup>, Young-Min Lee <sup>3\*</sup> and Soon Ju Yu <sup>1\*\*</sup>

<sup>1</sup> National Institute of Environmental Research, Han River Environment Research Center, 42, Dumulme-origil 68beon-gil, Yangseo-myeon, Yangpyeong-gun, Gyeonggi-do 12585, Korea; lim-jkjk@daum.net (J.K.I.); kys0522@korea.kr (Y.S.K.); anran1@korea.kr (H.R.N)

<sup>2</sup> Center for Reservoir and Aquatic Systems Research, Baylor University, Waco, TX 76798, USA; Sujin\_Kim@baylor.edu

<sup>3</sup> Brain Korea for Sustainable Health & Environment, Seoul National University, 1, Gwanak-ro, Gwanak-gu, Seoul 08826, Korea

\* Correspondence: ubyong@snu.ac.kr (Y.-M.L.); ysu1221@korea.kr (S.J.Y.); Tel.: +82-2-880-2810 (Y.-M.L.); +82-31-770-7240 (S.J.Y.)

## Table of Contents

**Figure S1.** Spatial trends for cumulative VOC concentrations at different sites.

**Table S1.** Physical and chemical properties of VOCs.

**Table S2.** Water quality data measured at the sampling sites.

**Table S3.** Purge-and-trap chromatography/mass spectrometry analytical conditions and parameters.

**Table S4.** Measured VOC concentrations during the sampling periods.

**Table S5.** Water quality guidelines for VOCs.

**Table S6.** ANOVA analysis of VOC concentration by sampling time and site

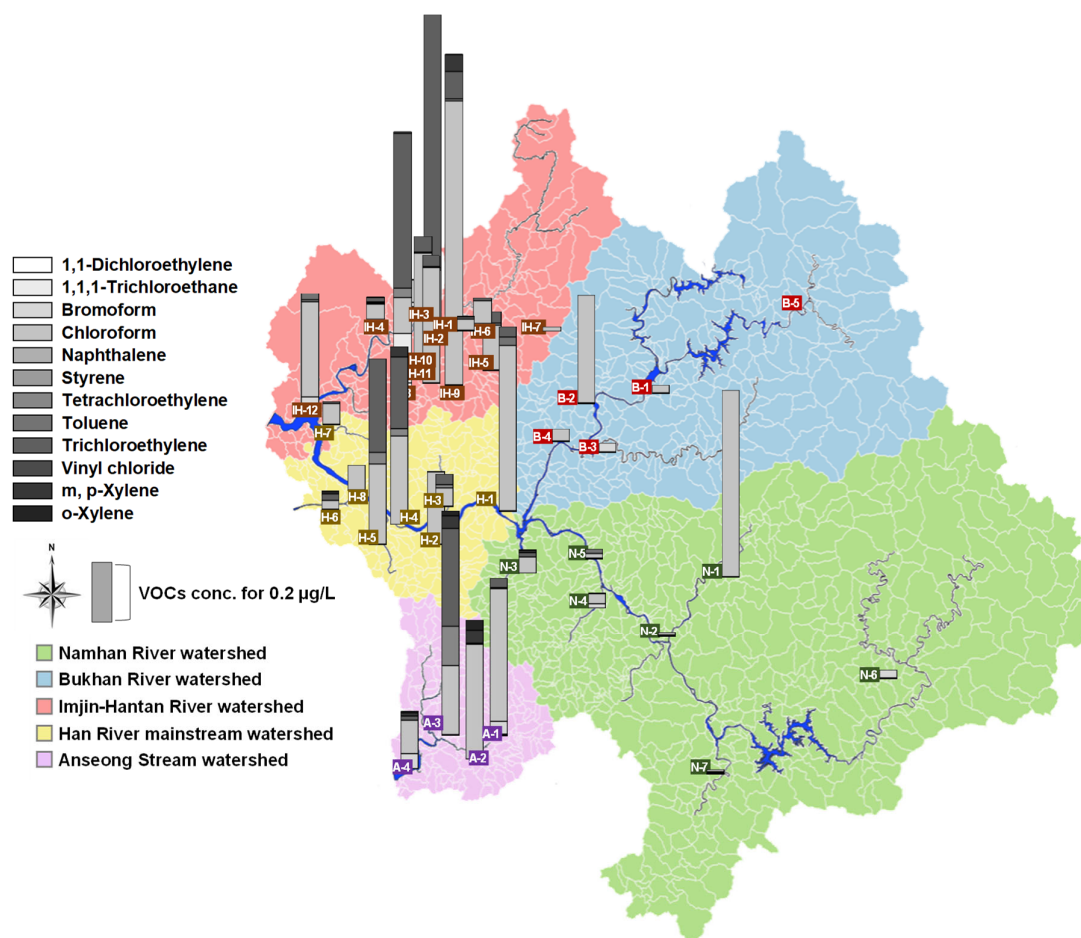

Figure S1. Spatial trends for cumulative VOC concentrations at different sites.

Table S1. Physical and chemical properties of VOCs.

| Compound<br>(Abb.)                   | CAS no.  | Molecular<br>formula                          | Molecular<br>weight<br>(g/mol) | Structure                                                                           | Density<br>at 20°C<br>(g/cm <sup>3</sup> ) | Solubility<br>in water<br>at 25°C<br>(mg/L) | Vapor<br>pressure<br>at 25°C<br>(mmHg) | Henrys law<br>constant<br>(atm-m <sup>3</sup> /mol) | log Kow | log Kaw * | log Koa * |
|--------------------------------------|----------|-----------------------------------------------|--------------------------------|-------------------------------------------------------------------------------------|--------------------------------------------|---------------------------------------------|----------------------------------------|-----------------------------------------------------|---------|-----------|-----------|
| 1,1-Dichloroethylene<br>(1,1-DCE)    | 75-35-4  | C <sub>2</sub> H <sub>2</sub> Cl <sub>2</sub> | 96.9                           | 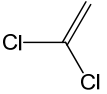   | 1.213                                      | 2420                                        | 600                                    | 0.03                                                | 2.13    | 0.089     | 2.04      |
| 1,1,1-Trichloroethane<br>(1,1,1-TCA) | 71-55-6  | C <sub>2</sub> H <sub>3</sub> Cl <sub>3</sub> | 133.4                          |    | 1.338                                      | 1290                                        | 124                                    | 0.02                                                | 2.49    | -0.087    | 2.58      |
| Bromoform                            | 75-25-2  | CHBr <sub>3</sub>                             | 252.7                          |    | 2.891                                      | 3100                                        | 5.4                                    | 0.00054                                             | 2.40    | -1.656    | 4.06      |
| Chloroform                           | 67-66-3  | CHCl <sub>3</sub>                             | 119.4                          |    | 1.483                                      | 7950                                        | 197                                    | 0.00                                                | 1.97    | -0.824    | 2.79      |
| Naphthalene                          | 91-20-3  | C <sub>10</sub> H <sub>8</sub>                | 128.2                          |  | 1.162                                      | 31                                          | 0.085                                  | 0.00044                                             | 3.30    | -1.745    | 5.05      |
| Styrene                              | 100-42-5 | C <sub>8</sub> H <sub>8</sub>                 | 104.2                          |  | 0.906                                      | 300                                         | 6.4                                    | 0.00                                                | 2.95    | -0.949    | 3.90      |
| Tetrachloroethylene<br>(PCE)         | 127-18-4 | C <sub>2</sub> Cl <sub>4</sub>                | 165.8                          |  | 1.623                                      | 206                                         | 18.5                                   | 0.02                                                | 3.40    | -0.087    | 3.49      |

|                         |          |                                  |       |                                                                                    |       |      |      |      |      |        |      |
|-------------------------|----------|----------------------------------|-------|------------------------------------------------------------------------------------|-------|------|------|------|------|--------|------|
| Toluene                 | 108-88-3 | C <sub>7</sub> H <sub>8</sub>    | 92.1  | 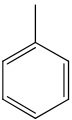  | 0.862 | 526  | 28.4 | 0.01 | 2.73 | -0.388 | 3.12 |
| Trichloroethylene (TCE) | 79-01-6  | C <sub>2</sub> HCl <sub>3</sub>  | 131.4 |   | 1.464 | 1280 | 69   | 0.01 | 2.61 | -0.388 | 3.00 |
| Vinyl chloride          | 75-01-4  | C <sub>2</sub> H <sub>3</sub> Cl | 62.5  |   | 0.911 | 2700 | 2980 | 0.03 | 1.46 | 0.089  | 1.37 |
| o-Xylene                | 95-47-6  | C <sub>8</sub> H <sub>10</sub>   | 106.2 |   | 0.880 | 180  | 6.7  | 0.01 | 3.12 | -0.388 | 3.51 |
| m-Xylene                | 108-38-3 | C <sub>8</sub> H <sub>10</sub>   | 106.2 |   | 0.870 | 160  | 8.3  | 0.01 | 3.20 | -0.388 | 3.59 |
| p-Xylene                | 106-42-3 | C <sub>8</sub> H <sub>10</sub>   | 106.2 |  | 0.861 | 165  | 8.8  | 0.01 | 3.15 | -0.388 | 3.54 |

Kow: Octanol-water partition coefficient; Kaw: Air-water partition coefficient; Koa: Octanol-air partition coefficient. \* Values estimated using EPI Suite™ ver. 4.11 (<https://www.epa.gov/tsc-screening-tools/download-epi-suite-estimation-program-interface-v411>). **Source:** PubChem (<https://pubchem.ncbi.nlm.nih.gov>).

**Table S2.** Water quality data measured at the sampling sites.

| Sampling Sites | Water Temp. (°C) | pH        | DO (mg/L)  | Cond. (µS/cm) |
|----------------|------------------|-----------|------------|---------------|
| N-1            | 21.5 ± 3.5       | 7.1 ± 0.4 | 6.2 ± 0.3  | 480 ± 135     |
| N-2            | 23.7 ± 4.8       | 8.7 ± 0.8 | 11.7 ± 3.0 | 264 ± 130     |
| N-3            | 22.4 ± 3.3       | 7.8 ± 0.3 | 9.7 ± 2.8  | 333 ± 189     |
| N-4            | 23.8 ± 3.8       | 7.7 ± 0.2 | 8.5 ± 1.5  | 974 ± 550     |
| N-5            | 22.2 ± 5.1       | 8.4 ± 0.6 | 10.8 ± 1.6 | 168 ± 78      |
| N-6            | 22.5 ± 7.3       | 8.6 ± 0.6 | 10.6 ± 1.6 | 208 ± 31      |
| N-7            | 24.3 ± 5.0       | 8.1 ± 0.7 | 9.3 ± 2.1  | 217 ± 57      |
| B-1            | 20.4 ± 5.7       | 8.1 ± 0.8 | 10.9 ± 2.2 | 172 ± 12      |
| B-2            | 19.2 ± 5.4       | 7.8 ± 0.3 | 10.6 ± 1.3 | 111 ± 62      |
| B-3            | 22.3 ± 6.1       | 8.1 ± 0.3 | 9.5 ± 0.8  | 167 ± 87      |
| B-4            | 20.6 ± 5.7       | 8.0 ± 0.3 | 10.3 ± 0.8 | 163 ± 59      |
| B-5            | 16.9 ± 6.7       | 7.7 ± 0.8 | 10.0 ± 1.2 | 86 ± 38       |
| IH-1           | 22.5 ± 6.4       | 8.7 ± 1.1 | 12.2 ± 3.5 | 524 ± 383     |
| IH-2           | 24.0 ± 5.1       | 8.1 ± 0.4 | 9.9 ± 1.2  | 1820 ± 1503   |
| IH-3           | 24.4 ± 5.7       | 8.6 ± 1.1 | 11.8 ± 3.1 | 173 ± 20      |
| IH-4           | 22.3 ± 5.8       | 8.8 ± 1.3 | 13.5 ± 4.6 | 589 ± 413     |
| IH-5           | 24.5 ± 7.3       | 7.9 ± 0.4 | 10.7 ± 1.8 | 898 ± 951     |
| IH-6           | 23.3 ± 8.3       | 8.1 ± 0.5 | 11.0 ± 1.8 | 831 ± 932     |
| IH-7           | 21.7 ± 7.0       | 8.4 ± 0.6 | 10.9 ± 1.8 | 193 ± 87      |
| IH-8           | 21.9 ± 6.2       | 7.9 ± 0.4 | 7.2 ± 0.4  | 1936 ± 1390   |
| IH-9           | 22.8 ± 6.1       | 7.7 ± 0.2 | 6.3 ± 0.8  | 2035 ± 1429   |
| IH-10          | 24.9 ± 5.9       | 7.8 ± 0.4 | 9.5 ± 2.9  | 2030 ± 1250   |
| IH-11          | 24.4 ± 4.5       | 7.6 ± 0.1 | 7.8 ± 1.2  | 2695 ± 1354   |
| IH-12          | 28.0 ± 2.0       | 8.0 ± 0.8 | 8.3 ± 0.7  | 1351 ± 89     |
| H-1            | 21.4 ± 4.9       | 7.2 ± 0.1 | 7.0 ± 1.4  | 496 ± 139     |
| H-2            | 21.5 ± 4.6       | 7.1 ± 0.1 | 5.8 ± 2.5  | 447 ± 183     |
| H-3            | 20.2 ± 5.2       | 7.6 ± 0.4 | 7.7 ± 2.2  | 211 ± 65      |
| H-4            | 21.6 ± 4.5       | 7.2 ± 0.1 | 6.7 ± 1.7  | 417 ± 217     |
| H-5            | 21.5 ± 4.7       | 7.4 ± 0.2 | 6.1 ± 0.2  | 501 ± 216     |
| H-6            | 20.5 ± 5.0       | 7.5 ± 0.3 | 6.1 ± 3.1  | 221 ± 40      |
| H-7            | 22.5 ± 4.9       | 7.9 ± 0.5 | 9.2 ± 3.0  | 564 ± 303     |
| H-8            | 19.2 ± 7.1       | 7.4 ± 0.2 | 6.2 ± 1.3  | 391 ± 90      |
| A-1            | 22.3 ± 1.8       | 7.7 ± 0.4 | 8.6 ± 2.9  | 520 ± 409     |
| A-2            | 26.0 ± 6.6       | 7.8 ± 0.5 | 9.7 ± 2.4  | 1157 ± 782    |
| A-3            | 22.2 ± 2.4       | 7.7 ± 0.2 | 6.4 ± 1.9  | 517 ± 288     |
| A-4            | 22.6 ± 6.1       | 8.1 ± 0.7 | 9.7 ± 3.0  | 1024 ± 547    |

Sampling date: April 07–08, 11; June 23–25; August 20, 26–27.

**Table S3.** Purge-and-trap gas chromatography/mass spectrometry analytical conditions and parameters [39].

| P&T Conditions            |                                                     |
|---------------------------|-----------------------------------------------------|
| Valve oven temperature    | 150 °C                                              |
| Transfer line temperature | 150 °C                                              |
| Syringe fill volume       | 25 mL                                               |
| Sample mount temperature  | 90 °C                                               |
| Purge                     | He, 40 mL/min, 0 °C for 11 min                      |
| Desorb                    | 200 mL/min, 250 °C for 2 min (preheat temp. 245 °C) |
| Bake                      | 400 mL/min, 260 °C for 10 min                       |

---

| GC/MS conditions |                           |                                                 |
|------------------|---------------------------|-------------------------------------------------|
| GC               | Column                    | Agilent DB-624 column (60 m × 0.32 mm × 1.8 μm) |
|                  | Carrier gas flow          | He at 1.0 mL/min constant flow                  |
|                  | Injector                  | temperature 250°C, Splitless mode               |
|                  | Oven temperature          | 30 °C for 2 min                                 |
|                  |                           | 8 °C/min to 140 °C, hold 10 min                 |
|                  |                           | 30 °C/min to 220 °C, hold 4 min                 |
| MS               | Ionization mode           | Electron Ionization (EI)                        |
|                  | Electron Energy           | 70 eV                                           |
|                  | Source temperature        | 200 °C                                          |
|                  | Transfer line temperature | 250 °C                                          |
|                  | Data Acquisition          | Selected Ions Monitoring (SIM)                  |

---

**Table S4.** Measured VOC concentrations during the sampling periods.

| Compound                          | MDL   | Min   | Max   | Average ± std | Median | 75%   | 95%   | DF (n=108) |
|-----------------------------------|-------|-------|-------|---------------|--------|-------|-------|------------|
| 1,1-Dichloroethylene (1,1-DCE)    | 0.06  | 0.000 | 0.062 | 0.001 ± 0.006 | 0.000  | 0.000 | 0.000 | 1          |
| 1,1,1-Trichloroethane (1,1,1-TCA) | 0.011 | 0.000 | 0.498 | 0.005 ± 0.048 | 0.000  | 0.000 | 0.000 | 3          |
| Bromoform                         | 0.010 | 0.000 | 0.093 | 0.006 ± 0.018 | 0.000  | 0.000 | 0.056 | 13         |
| Chloroform                        | 0.012 | 0.000 | 2.659 | 0.187 ± 0.330 | 0.069  | 0.252 | 0.560 | 81         |
| Naphthalene                       | 0.007 | n.d.  | n.d.  | n.d.          | n.d.   | n.d.  | n.d.  | 0          |
| Styrene                           | 0.005 | 0.000 | 0.010 | 0.000 ± 0.001 | 0.000  | 0.000 | 0.000 | 3          |
| Tetrachloroethylene (PCE)         | 0.010 | 0.000 | 0.264 | 0.008 ± 0.031 | 0.000  | 0.000 | 0.030 | 16         |
| Toluene                           | 0.009 | 0.000 | 0.085 | 0.002 ± 0.010 | 0.000  | 0.000 | 0.019 | 7          |
| Trichloroethylene (TCE)           | 0.005 | 0.000 | 2.450 | 0.075 ± 0.289 | 0.000  | 0.028 | 0.380 | 47         |
| Vinyl chloride                    | 0.009 | n.d.  | n.d.  | n.d.          | n.d.   | n.d.  | n.d.  | 0          |
| m, p-Xylene                       | 0.007 | 0.000 | 0.150 | 0.006 ± 0.025 | 0.000  | 0.000 | 0.021 | 13         |
| o-Xylene                          | 0.005 | 0.000 | 0.111 | 0.002 ± 0.012 | 0.000  | 0.000 | 0.006 | 8          |
| total VOCs                        |       |       |       | 0.291 ± 0.469 |        |       |       |            |

MDL: method detection limit. n.d.: Not detected; DF: Detection frequency. total VOCs: Sum of individual VOC (such as ΣVOC).

**Table S5.** Water quality guidelines for VOCs [39].

| Compound                          | Ambient Water (µg/L) * |                       | South Korea | Drinking Water (µg/L) ** |                      |       |        |             |                    |                   |
|-----------------------------------|------------------------|-----------------------|-------------|--------------------------|----------------------|-------|--------|-------------|--------------------|-------------------|
|                                   | EU                     |                       |             | USA                      |                      | WHO   | EU     | South Korea | USA                |                   |
|                                   | AA-EQS <sup>1)</sup>   | MAC-EQS <sup>2)</sup> |             | W+O <sup>3)</sup>        | O only <sup>4)</sup> |       |        |             | MCLG <sup>5)</sup> | MCL <sup>6)</sup> |
| 1,1-Dichloroethylene (1,1-DCE)    | -                      | -                     | -           | 300                      | 20000                | -     | 30     | 7           | 7                  | -                 |
| 1,1,1-Trichloroethane (1,1,1-TCA) | -                      | -                     | -           | 10000                    | 200000               | -     | 100    | 200         | 200                | -                 |
| Bromoform                         | -                      | -                     | -           | 7                        | 120                  | -     | 100(R) | 0           | -                  | 100               |
| Chloroform                        | 2.5                    | not applicable        | 80          | 60                       | 2000                 | -     | 80     | 70          | -                  | 300               |
| Naphthalene                       | 2                      | 130                   | -           | -                        | -                    | -     | -      | -           | -                  | -                 |
| Styrene                           | -                      | -                     | -           | -                        | -                    | -     | 20(R)  | 100         | 100                | 20                |
| Tetrachloroethylene (PCE)         | 10                     | not applicable        | 40          | 10                       | 29                   | 10(S) | 10     | 0           | 5                  | 40                |
| Toluene                           | -                      | -                     | -           | 57                       | 520                  | -     | 700    | 1000        | 1000               | 700               |
| Trichloroethylene (TCE)           | 10                     | not applicable        | -           | 0.6                      | 7                    | 10(S) | 30     | 0           | 5                  | 20(P)             |
| Vinyl chloride                    | -                      | -                     | -           | 0.022                    | 1.6                  | 0.5   | 2(R)   | 0           | 2                  | 0.3               |
| Xylenes-total                     | -                      | -                     | -           | -                        | -                    | -     | 500    | 10000       | 10000              | 500               |

---

AA-EQS: Annual Average-Environmental Quality Standards; MAC-EQS: Maximum Allowable Concentration-Environmental Quality Standards; DWQS: Drinking water quality standards; MCLG: Maximum contaminant level goal; MCL: Maximum contaminant level; HBGV: Health-based guideline value. (S) Sum of PCE and TCE; (R) Recommendation criteria for drinking water quality; (P) Provisional guideline value because of uncertainties in the health database. <sup>1)</sup> Unless otherwise specified, applies to the total concentration of all isomers. <sup>2)</sup> Where the MAC-EQS are marked as 'not applicable', AA-EQS values are considered protective against short-term pollution peaks in continuous discharges since they are significantly lower than the values derived on the basis of acute toxicity. <sup>3)</sup> Human Health for the consumption of water and organism. <sup>4)</sup> Human Health for the consumption of organism only. <sup>5)</sup> The level of a contaminant in drinking water below which there is no known or expected risk to health. MCLGs allow for a margin of safety and are non-enforceable public health goals. <sup>6)</sup> The highest level of a contaminant that is allowed in drinking water. MCLs are set as close to MCLGs as feasible using the best available treatment technology and taking cost into consideration. MCLs are enforceable standards. \* **Source:** - EU: Environmental quality standards (<https://eur-lex.europa.eu/legal-content/EN/ALL/?uri=CELEX:32013L0039>). - South Korea: Water Quality Standards (Water Environment Conservation Act (Act No. 16605) > Administrative Rules: Ministry of Environment (MoE) Notice No. 2018-6 (<https://www.law.go.kr/LSW/admRulInfoP.do?admRulSeq=2100000111712>)). - USA: Water Quality Criteria (<https://www.epa.gov/wqc/national-recommended-water-quality-criteria-human-health-criteria-table>). \*\* **Source:** - EU: Drinking water directive (<https://eur-lex.europa.eu/legal-content/EN/TXT/?uri=CELEX:01998L0083-20151027>). - South Korea: Drinking Water Quality Standards. (a) Water Supply and Waterworks Installation Act (Act No. 17178) > Enforcement Rule: Ministry of Environment (MoE) Decree No. 833, [Attached Table 1] (<https://www.law.go.kr/LSW/lsInfoP.do?lsiSeq=212567&lsId=007134&efYd=20191220&chrClsCd=010102&viewCls=lsInfoP&ancYnChk=#J8823815>). (b) Drinking Water Management Act (Act No. 17326) > Administrative Rules: Ministry of Environment (MoE) Notice No. 2019-81, [Attached Table 1] (<https://law.go.kr/LSW/admRulLsInfoP.do?chrClsCd=&admRulSeq=2100000178074#J1996368>). - USA: National primary drinking water regulations (<https://www.epa.gov/ground-water-and-drinking-water/national-primary-drinking-water-regulations#one>). - WHO: Drinking water quality guidelines (<https://www.who.int/teams/environment-climate-change-and-health/water-sanitation-and-health/water-safety-and-quality/drinking-water-quality-guidelines>).



**Table S6.** ANOVA analysis of VOC concentration by sampling time and site.

| Compound                          | Sampling Time<br>(3 months) | Sampling Site<br>(36 sites) |
|-----------------------------------|-----------------------------|-----------------------------|
| 1,1-Dichloroethylene (1,1-DCE)    | 0.379                       | 0.743                       |
| 1,1,1-Trichloroethane (1,1,1-TCA) | 0.411                       | 0.764                       |
| Bromoform                         | <b>0.020</b>                | <b>0.003</b>                |
| Chloroform                        | <b>0.016</b>                | 0.313                       |
| Styrene                           | 0.244                       | 0.371                       |
| Tetrachloroethylene (PCE)         | 0.174                       | <b>0.015</b>                |
| Toluene                           | 0.305                       | 0.721                       |
| Trichloroethylene (TCE)           | <b>0.047</b>                | 0.384                       |
| Xylenes                           | 0.198                       | <b>0.013</b>                |
